# Supplementary material for: Size control of SSZ-13 crystals with APAM and its influence on the coking behaviour during MTO reaction
Source: Royal Society of Chemistry journal article supplement (doi:10.1039/c9cy00412b), 2019-01-01
Supplement: c9cy00412b1.pdf [file c9cy00412b1.pdf]

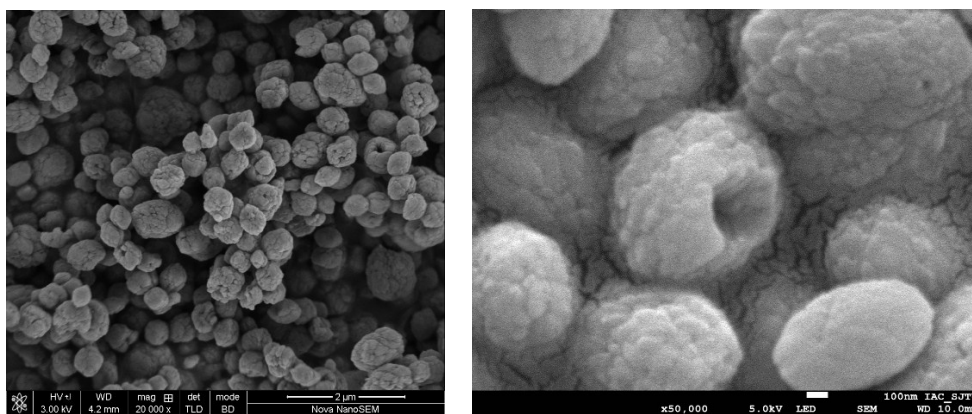

Fig. S1 SEM images of sample 13 (left) and sample 1(right)

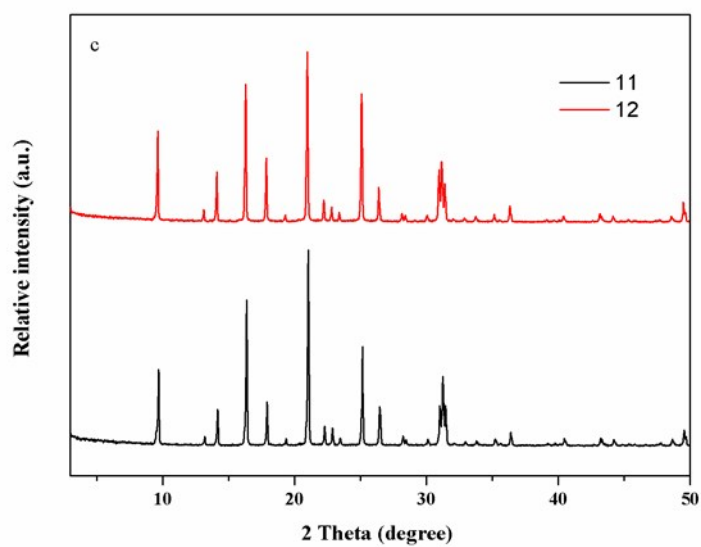

Fig. S2 XRD patterns of sample 11 and 12 heated for 12h.

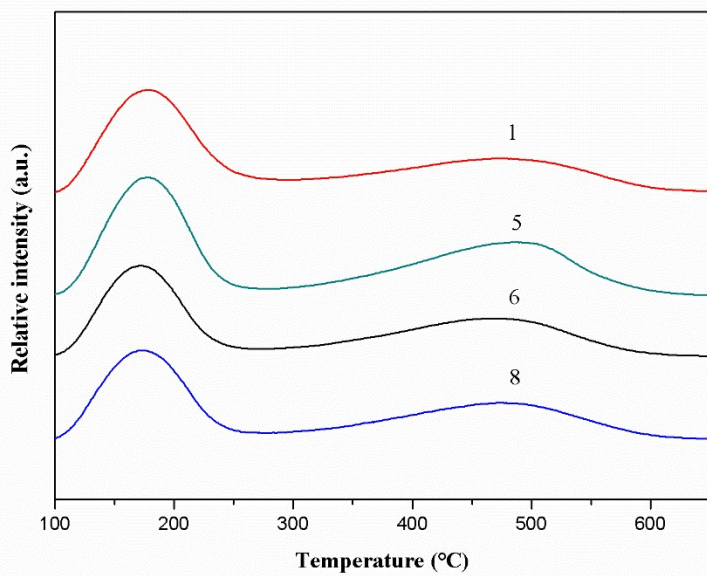

Fig. S3 NH<sub>3</sub>-TPD of sample 1; 6; 8.

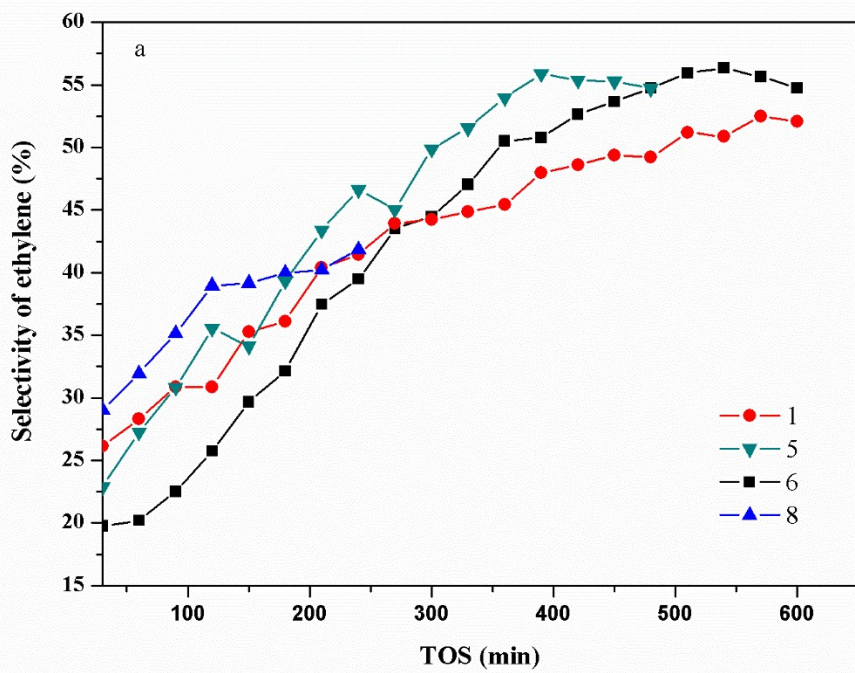

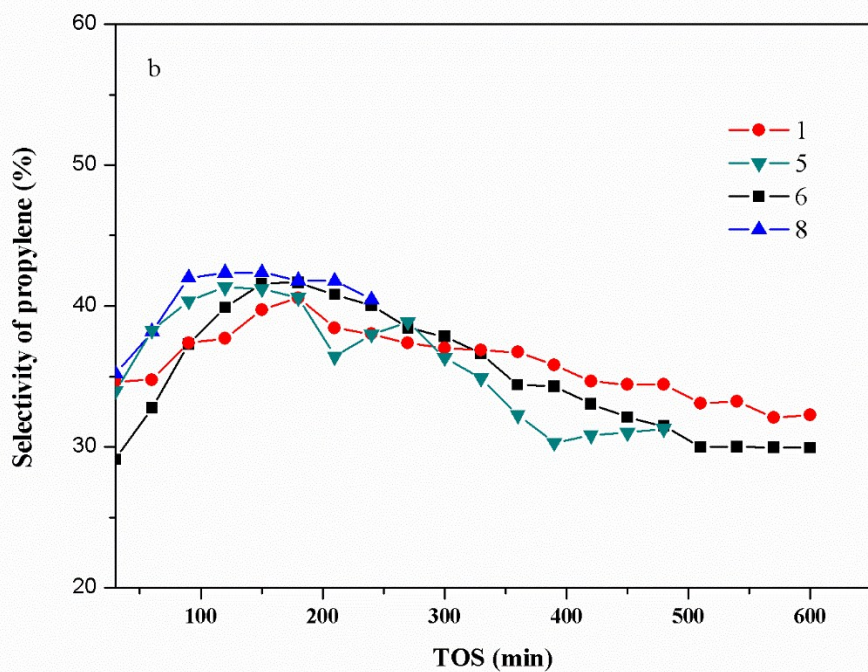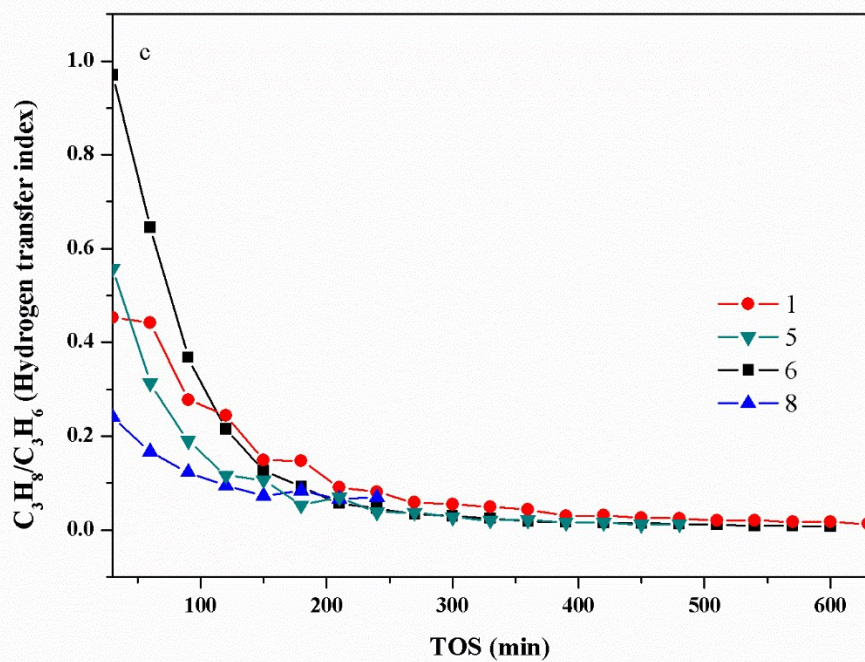

**Fig. S4** Ethylene selectivity (a) , propylene selectivity (b) and C<sub>3</sub>H<sub>8</sub> to C<sub>3</sub>H<sub>6</sub> ratio (c) of sample 6, 1 and 8 with time on stream

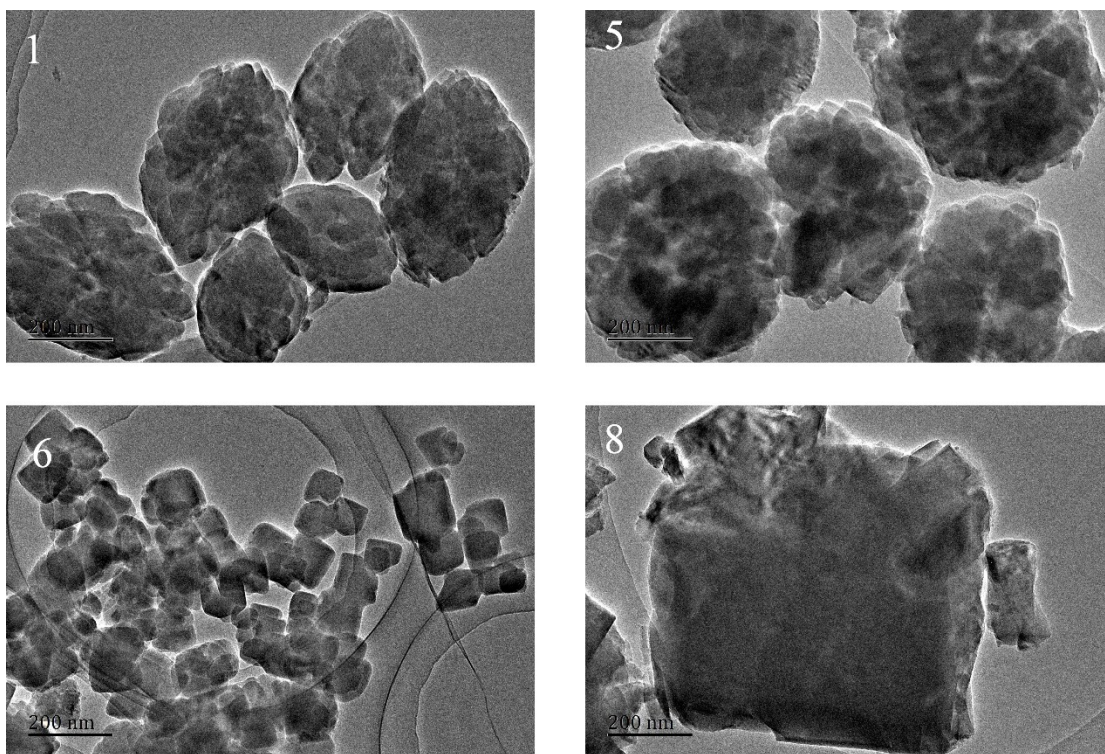

**Fig. S5** TEM images of samples 1, 5, 6 and 8 after MTO reaction.

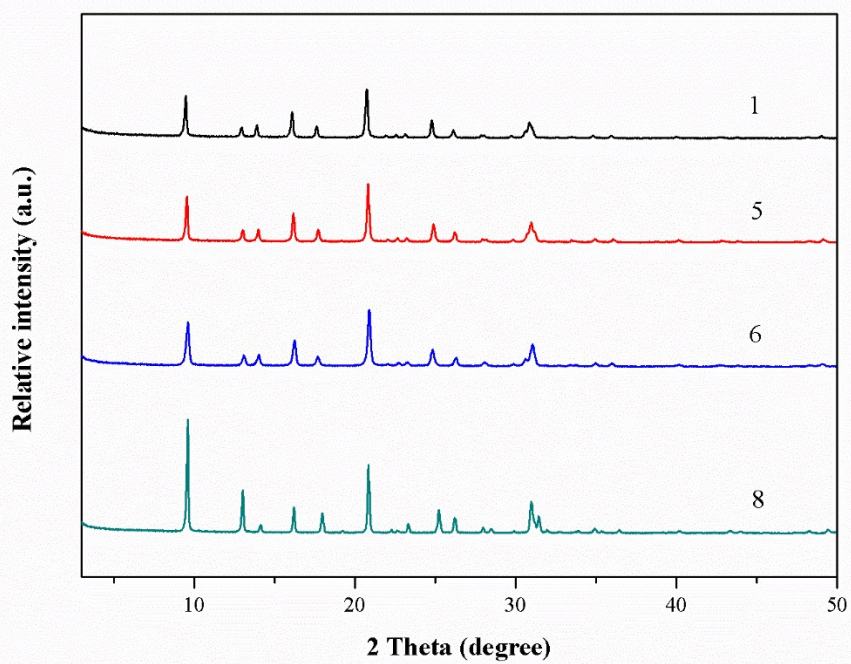

**Fig. S6** XRD patterns of samples 1, 5, 6 and 8 after MTO reaction.
